# Supplementary material for: PbLAC4-like, activated by PbMYB26, related to the degradation of anthocyanin during color fading in pear
Source: Research Square preprint supplement (doi:10.21203/rs.3.rs-225654/v1), 2021-02-25
Supplement: Supplementary file 1 [file 76edeac6f1b880feb90e3b76.xlsx]

## Sheet: Sheet1
Table 1
Correlation analysis of the anthocyanin content and the expression level of PbLAC4-like gene in leaves.
	PbLAC4-like
	‘Zaosu’	‘Red Zaosu’	‘2 hao’	‘7 hao’	‘Cuiguan’
Anthocyanin	-.950**	-.946**	-.964**	-.907**	-.714*
**: Correlation is significant at the level of 0.01 (bilateral); *: Correlation is significant at the 0.05 level (bilateral).
