# Supplementary material for: PbLAC4-like, activated by PbMYB26, related to the degradation of anthocyanin during color fading in pear
Source: Research Square preprint supplement (doi:10.21203/rs.3.rs-225654/v1), 2021-02-25
Supplement: Supplementary file 3 [file a95948d7e1c1463cbc69276c.xlsx]

## Sheet: Sheet1
Table S1
The GenBank accessions of related proteins.
Protein	GenBank Accession
PbLAC4-like	XP_009358852
PbLAC17-like	XP_009358279
PbLAC	QBA30209
LcLAC	GU367910
AtLAC15	NP_199621
AtLAC4	NP_565881
AtLAC11	NP_195946
AtLAC2	NP_180477
AtLAC17	NP_200810
AtMYB46	NP_196791
PbMYB26	XP_009355526
PbMYB39	XP_009364986
PbMYB46-44	XP_009376885
PbMYB46-77	XP_009354742
PbMYB46-97	XP_009343724
PbMYB86	XP_009365451
