# Supplementary material for: PbLAC4-like, activated by PbMYB26, related to the degradation of anthocyanin during color fading in pear
Source: Research Square preprint supplement (doi:10.21203/rs.3.rs-225654/v1), 2021-02-25
Supplement: Supplementary file 6 [file d30f15341752072a7cc9896c.xlsx]

## Sheet: Sheet1
Table S2
Sequences of primers used for qRT-PCR analysis.
Gene	Gene ID		Sequence of Forward (5'-3') and Reverse Primers (5'-3')
PbActin	XM_009335725		F TGAGTCACACTGTGCCAATCTATG
			R TGGTGAACATGTACCCTCTTTCAG
PbLAC4-like	XM_009360577		F TCACACCATTAACGGTCATCC
			R AGGTAAGTCTTGCCGCTTTC
PbMYB26	XM_009357251		F ACAGAAAGTGAAGAGGGGGC
			R GGCCTGCAAGTTTAGGAACTG
PbMYB39	XM_009366711		F GCCGTTAACAGCAACCCATT
			R CGATATCGTCTGCATGGGC
PbMYB46-44	XM_009378610		F GCTCACCAAACACAAGCGAC
			R AATAATGACCCTACCGGCTGC
PbMYB46-77	XM_009356467		F GGCCCATGCAGACGACG
			R ATGCTTCTGCTTTCGAGTGGA
PbMYB46-97	XM_009345449		F CGGAGGGTTCATTAGTCCCG
			R GTGGTTGAGGATCGTAGATTGC
PbMYB86	XM_009367176		F GCGCTAAAATCCAACGACCC
			R GTAGCAGGCTGAGAGGCTTG
